# Supplementary material for: Whole Transcriptome Profiling of Successful Immune Response to Vibrio Infections in the Oyster Crassostrea gigas by Digital Gene Expression Analysis
Source: PubMed Central journal article supplement (PMC3150398; doi:10.1371/journal.pone.0023142), 2011-08-04
Supplement: pone.0023142.s001.pdf [file pone.0023142.s001.pdf]

**Table S1:** List of functional groups and related hemocyte up-regulated genes from oysters surviving virulent *versus* avirulent *Vibrio* infections.

| Function               | Gene name                                                     | Species: GenBank accession number                | Blastx e-value (identities) | occurrence |       | No of tags | No of ESTs |
|------------------------|---------------------------------------------------------------|--------------------------------------------------|-----------------------------|------------|-------|------------|------------|
|                        |                                                               |                                                  |                             | SVir       | SaVir |            |            |
| <b>Immune response</b> |                                                               |                                                  |                             |            |       |            |            |
|                        | <b>Signaling pathways</b>                                     |                                                  |                             |            |       |            |            |
|                        | Toll9                                                         | <i>Anopheles gambiae</i> : AAL37903              | 1e-15 (33%)                 | 8          | 1     | 1          | 1          |
|                        | TGF beta-activated protein kinase kinase kinase 7             | <i>Salmo salar</i> : ACN10470                    | 4e-24 (52%)                 | 11         | 5     | 1          | 1          |
|                        | MAP kinase-interacting serine/threonine-protein kinase 1      | <i>Mus musculus</i> : NP_067436                  | 5e-116 (61%)                | 71         | 28    | 2          | 1          |
|                        | Inhibitor of nuclear factor kappa-B kinase subunit epsilon    | <i>Mus musculus</i> : BAA85154                   | 3e-88 (56%)                 | 3          | 0     | 1          | 1          |
|                        | Inhibitor kappa B                                             | <i>Argopecten irradians</i> : ACZ34178           | 7e-46 (40%)                 | 10         | 2     | 1          | 1          |
|                        | Syntenin-1                                                    | <i>Rattus norvegicus</i> : NP_114192             | 2e-84 (56%)                 | 89         | 24    | 1          | 1          |
|                        | Guanine nucleotide binding protein (G protein), gamma 7       | <i>Xenopus tropicalis</i> : NP_001017133         | 4e-06 (43%)                 | 13         | 4     | 3          | 3          |
|                        | Lipopolysaccharide induced TNF-alpha factor                   | <i>Chlamys farreri</i> : ABI79459                | 1e-35 (86%)                 | 177        | 74    | 2          | 1          |
|                        | <b>Cytokine-cytokine receptor interaction</b>                 |                                                  |                             |            |       |            |            |
|                        | Tumor necrosis factor ligand superfamily member 10            | <i>Sus scrofa</i> : NP_001019867                 | 1e-09 (26%)                 | 16         | 2     | 1          | 1          |
|                        | C3a anaphylatoxin chemotactic receptor                        | <i>Danio rerio</i> : P0C7U4                      | 5e-06 (26%)                 | 26         | 13    | 1          | 1          |
|                        | * Interferon-induced protein 44                               | <i>Salmo salar</i> : NP_001133872                | 1e-23 (35%)                 | 3          | 1     | 1          | 1          |
|                        | <b>Lectin</b>                                                 |                                                  |                             |            |       |            |            |
|                        | * C-type lectin 2 like protein                                | <i>Crassostrea gigas</i> : CAE18170              | 0.0 (100%)                  | 30         | 7     | 2          | 3          |
|                        | * Rhamnospondin 1, L-rhamnose-binding lectin                  | <i>Hydractinia symbiolongicarpus</i> : ABD95939  | 7e-17 (44%)                 | 128        | 0     | 1          | 1          |
|                        | <b>Protease inhibitor, stress response protein and others</b> |                                                  |                             |            |       |            |            |
|                        | * Cystatin A2                                                 | <i>Dictyostelium discoideum</i> : XP_641175      | 4e-13 (52%)                 | 20         | 9     | 1          | 1          |
|                        | * Cystatin B-like protein                                     | <i>Crassostrea gigas</i> : ADI33157              | 0.0 (100%)                  | 108        | 43    | 2          | 2          |
|                        | Proteinase inhibitor I4 serpin                                | <i>Chlorobium limicola</i> : YP_001943402        | 1e-15 (59%)                 | 29         | 10    | 2          | 2          |
|                        | Tissue inhibitor of metalloproteinase ( <i>Cg</i> -TIMP)      | <i>Crassostrea gigas</i> : AAT73610 and AAG42824 | 0.0 (100%)                  | 5727       | 2640  | 4          | 5          |
|                        | Heat shock protein 70                                         | <i>Crassostrea gigas</i> : AAD31042              | 0.0 (100%)                  | 140        | 67    | 1          | 1          |
|                        | * Heat shock protein 22 isoform 1                             | <i>Venerupis philippinarum</i> : ACU83231        | 3e-22 (61%)                 | 158        | 40    | 2          | 4          |
|                        | Heat shock protein beta-1                                     | <i>Caligus clemensi</i> : ACO14969               | 3e-12 (40%)                 | 110        | 24    | 1          | 1          |
|                        | Small heat shock protein                                      | <i>Trichinella pseudospiralis</i> : ABJ55915     | 2e-16 (37)                  | 5          | 0     | 1          | 1          |

|                                    |                                                         |                                                   |              |       |      |   |   |
|------------------------------------|---------------------------------------------------------|---------------------------------------------------|--------------|-------|------|---|---|
|                                    | Universal stress protein G                              | <i>Schistosoma mansoni</i> : XP_002578809         | 2e-14 (32%)  | 13    | 5    | 1 | 1 |
|                                    | Serum amyloid protein A                                 | <i>Branchiostoma belcheri</i> : BAB97379          | 8e-45 (83%)  | 59    | 28   | 1 | 1 |
|                                    | Viperine-like protein                                   | <i>Suberites domuncula</i> : CAL36990             | 2e-79 (70%)  | 3     | 1    | 1 | 1 |
|                                    | Lysozyme 1                                              | <i>Crassostrea gigas</i> : BAD19059               | 0.0 (100%)   | 254   | 82   | 1 | 1 |
|                                    | Complement component 1q subcomponent-like 1-like        | <i>Danio rerio</i> : XP_695928                    | 1e-4 (46%)   | 40    | 1    | 1 | 1 |
|                                    | * Metallothionein IV                                    | <i>Crassostrea gigas</i> : CAK22381               | 0.0 (100%)   | 15095 | 6212 | 7 | 6 |
| <b>cell adhesion-communication</b> |                                                         |                                                   |              |       |      |   |   |
|                                    | * Integrin beta-PS                                      | <i>Camponotus floridanus</i> : EFN70798           | 1e-15 (35%)  | 24    | 7    | 1 | 1 |
|                                    | Cysteine and histidine-rich domain-containing protein 1 | <i>Gallus gallus</i> : NP_001026003               | 7e-71 (57%)  | 8     | 1    | 1 | 1 |
|                                    | Calcium and integrin-binding protein 1                  | <i>Camponotus floridanus</i> : EFN62878           | 8e-50 (64%)  | 35    | 14   | 2 | 2 |
|                                    | Collagen alpha-1(XII) chain precursor                   | <i>Gallus gallus</i> : NP_99035                   | 4e-16 (40%)  | 3     | 0    | 1 | 1 |
|                                    | Collagen, type XXII, alpha 1                            | <i>Gallus gallus</i> : NP_001132911               | 5e-23 (40%)  | 4     | 0    | 1 | 1 |
|                                    | Collagen, type X, alpha 1                               | <i>Danio rerio</i> : NP_001077296                 | 9e-09 (33%)  | 5     | 1    | 1 | 1 |
|                                    | Fibrillar collagen                                      | <i>Arenicola marina</i> : AAC47545                | 2e-07 (69%)  | 10    | 2    | 1 | 1 |
|                                    | Collagen receptor related protein                       | <i>Crassostrea gigas</i> : AAQ13478               | 0.0 (100%)   | 20    | 6    | 1 | 1 |
|                                    | Collagen pro alpha-chain                                | <i>Halotis discus</i> : BAA75668                  | 4e-40 (41%)  | 8     | 2    | 1 | 1 |
|                                    | Collagen protein                                        | <i>Mytilus edulis</i> : ABA03049                  | 3e-29 (52%)  | 11    | 1    | 1 | 1 |
|                                    | Procollagen                                             | <i>Loa loa</i> : XP_003139504                     | 2e-04 (75%)  | 346   | 117  | 1 | 1 |
|                                    | Neural-cadherin                                         | <i>Camponotus floridanus</i> : EFN64630           | 2e-14 (45%)  | 32    | 10   | 2 | 1 |
|                                    | Cytohesin-1                                             | <i>Harpegnathos saltator</i> : EFN84340           | 8e-10 (76%)  | 2     | 0    | 1 | 1 |
|                                    | Dermatopontin 2                                         | <i>Halotis diversicolor supertexta</i> : ACH48240 | 1e-32 (46%)  | 39    | 8    | 1 | 1 |
|                                    | Tetraspanin                                             | <i>Heliocidaris tuberculata</i> : ABE27955        | 7e-17 (29%)  | 358   | 0    | 1 | 1 |
|                                    | Tetraspanin 33                                          | <i>Danio rerio</i> : CAI20758                     | 5e-11 (37%)  | 67    | 0    | 1 | 1 |
|                                    | Tetraspanin 96F                                         | <i>Drosophila melanogaster</i> : NP_524500        | 5e-09 (33%)  | 44    | 20   | 1 | 1 |
|                                    | Protein kish-A precursor                                | <i>Gallus gallus</i> : NP_001106925               | 1e-17 (83%)  | 4     | 2    | 1 | 2 |
|                                    | Transmembrane protein 79, isoform CRA_a                 | <i>Homo sapiens</i> : EAW52970                    | 2e-06 (25%)  | 5     | 1    | 1 | 1 |
|                                    | Dermal papilla derived protein, putative                | <i>Ixodes scapularis</i> : XP_002399750           | 8e-36 (37%)  | 6     | 3    | 1 | 1 |
|                                    | Transmembrane protease, serine 2                        | <i>Xenopus laevis</i> : NP_001090208              | 1e-34 (48%)  | 8     | 2    | 1 | 1 |
|                                    | Fibrillin-2                                             | <i>Harpegnathos saltator</i> : EFN80554           | 3e-120 (39%) | 16    | 8    | 1 | 1 |
|                                    | Adhesion molecule homolog family member (lad-2)         | <i>Caenorhabditis elegans</i> : NP_001023497      | 3e-09 (32%)  | 4     | 2    | 1 | 1 |
|                                    | Flamingo 1                                              | <i>Gallus gallus</i> : AAR83924                   | 3e-13 (42%)  | 14    | 4    | 1 | 1 |
|                                    | Gamma-secretase subunit pen-2, putative                 | <i>Pediculus humanus corporis</i> : XP_002426899  | 3e-29 (65%)  | 4     | 0    | 1 | 1 |

|                                    |                                                                |                                              |              |      |     |   |   |
|------------------------------------|----------------------------------------------------------------|----------------------------------------------|--------------|------|-----|---|---|
|                                    | Osteonectin-like protein                                       | <i>Phragmatopoma lapidosa</i> : ACV72069     | 7e-52 (46%)  | 3    | 0   | 1 | 1 |
| <b>Cytoskeleton reorganisation</b> |                                                                |                                              |              |      |     |   |   |
|                                    | <b>Actin related molecules</b>                                 |                                              |              |      |     |   |   |
|                                    | Actin 2                                                        | <i>Crassostrea gigas</i> : BAB84579          | 0.0 (100%)   | 2546 | 799 | 2 | 1 |
|                                    | Ankyrin repeat protein                                         | <i>Trichomonas vaginalis</i> : XP_001314547  | 4e-39 (42%)  | 3    | 0   | 1 | 1 |
|                                    | * Radixin                                                      | <i>Mus musculus</i> : EDL25785               | 1e-94 (88%)  | 3    | 1   | 1 | 1 |
|                                    | F-actin-capping protein subunit alpha                          | <i>Harpegnathos saltator</i> : EFN89112      | 4e-107 (67%) | 4    | 2   | 1 | 1 |
|                                    | Kelch-like protein 5                                           | <i>Danio rerio</i> : NP_001164413            | 7e-17 (73%)  | 19   | 6   | 1 | 1 |
|                                    | Ring canal kelch protein                                       | <i>Culex quinquefasciatus</i> : XP_001843614 | 2e-17 (24%)  | 36   | 6   | 1 | 1 |
|                                    | Actin-interacting protein 1                                    | <i>Trichinella spiralis</i> : EFV49821       | 7e-26 (40%)  | 39   | 16  | 1 | 1 |
|                                    | Myosin light polypeptide 6                                     | <i>Lycosa singoriensis</i> : ABX75511        | 2e-52 (68%)  | 128  | 39  | 1 | 2 |
|                                    | Myosin essential light chain                                   | <i>Crassostrea gigas</i> : CAD91423          | 0.0 (100%)   | 885  | 118 | 5 | 1 |
|                                    | Myosin heavy chain cardiac muscle specific isoform 2           | <i>Argopecten irradians</i> : AAF62395       | 5e-05 (72%)  | 102  | 22  | 1 | 1 |
|                                    | Myosin heavy chain                                             | <i>Placopecten magellanicus</i> : AAB03661   | 5e-42 (81%)  | 30   | 11  | 1 | 1 |
|                                    | Myosin II heavy chain                                          | <i>Polysphondylium pallidum</i> : EFA84750   | 2e-06 (24%)  | 5    | 0   | 1 | 1 |
|                                    | Myosin regulatory light chain                                  | <i>Pecten maximus</i> : AAD52844             | 3e-18 (63%)  | 9    | 0   | 1 | 1 |
|                                    | Myosin regulatory light chain                                  | <i>Placopecten magellanicus</i> : AAB02931   | 5e-59 (71%)  | 28   | 10  | 1 | 1 |
|                                    | Titin                                                          | <i>Harpegnathos saltator</i> : EFN83272      | 5e-28 (29%)  | 8    | 3   | 1 | 1 |
|                                    | Titin                                                          | <i>Mus musculus</i> : EDL27217               | 1e-42 (37%)  | 11   | 0   | 1 | 1 |
|                                    | Paramyosin protein                                             | <i>Crassostrea gigas</i> : CAD79338          | 0.0 (100%)   | 4    | 2   | 1 | 1 |
|                                    | Protein Shroom2                                                | <i>Xenopus tropicalis</i> : NP_001072178     | 1e-21 (47%)  | 5    | 1   | 1 | 1 |
|                                    | Receptor of activated kinase C                                 | <i>Crassostrea angulata</i> : ACU33969       | 0.0 (100%)   | 4    | 0   | 1 | 1 |
|                                    | * Fascin                                                       | <i>Parasteatoda tepidariorum</i> : BAI83409  | 2e-27 (41%)  | 15   | 2   | 1 | 1 |
|                                    | Partitioning defective protein 6                               | <i>Trichinella spiralis</i> : EFV60907       | 9e-22 (60%)  | 13   | 5   | 1 | 1 |
|                                    | Cortactin isoform a variant                                    | <i>Homo sapiens</i> : BAD96333               | 2e-09 (76%)  | 7    | 3   | 1 | 1 |
|                                    | Calponin-like protein                                          | <i>Mytilus galloprovincialis</i> : BAB60813  | 5e-105 (54%) | 8    | 2   | 2 | 2 |
|                                    | Calcineurin B subunit                                          | <i>Pinctada fucata</i> : ACI96107            | 2e-83 (98%)  | 18   | 2   | 2 | 1 |
|                                    | <b>Endocytose related molecule</b>                             |                                              |              |      |     |   |   |
|                                    | Low-density lipoprotein Receptor Related family member (Irp-1) | <i>Caenorhabditis elegans</i> : NP_492127    | 5e-09 (38%)  | 7    | 3   | 1 | 1 |
|                                    | Tyrosine phosphatase                                           | <i>Crassostrea gigas</i> : ACH42087          | 0.0 (100%)   | 9    | 1   | 1 | 1 |
|                                    | Vacuolar protein sorting-associated protein 28-like protein    | <i>Harpegnathos saltator</i> : EFN81106      | 4e-79 (73%)  | 32   | 6   | 1 | 1 |
|                                    | AP-2 complex subunit beta-1, putative                          | <i>Ixodes scapularis</i> : XP_002412040      | 5e-28 (70%)  | 124  | 49  | 1 | 1 |

|  |                                                                          |                                                     |              |     |    |   |   |
|--|--------------------------------------------------------------------------|-----------------------------------------------------|--------------|-----|----|---|---|
|  | Charged multivesicular body protein 2a                                   | <i>Xenopus tropicalis</i> : NP_001005008            | 3e-46 (84%)  | 3   | 1  | 1 | 1 |
|  | Charged multivesicular body protein 2b                                   | <i>Ictalurus punctatus</i> : NP_001187612           | 4e-26 (60%)  | 4   | 2  | 1 | 2 |
|  | Myoferlin                                                                | <i>Rattus norvegicus</i> : NP_001178565             | 5e-10 (42%)  | 26  | 6  | 1 | 1 |
|  | <b>Lysosome</b>                                                          |                                                     |              |     |    |   |   |
|  | Lysosome-associated membrane glycoprotein 1                              | <i>Harpegnathos saltator</i> : EFN79114             | 6e-15 (56%)  | 6   | 0  | 1 | 1 |
|  | Lysosomal thioesterase PPT2                                              | <i>Danio rerio</i> : NP_001103329                   | 2e-57 (53%)  | 25  | 1  | 3 | 1 |
|  | Hexosaminidase A                                                         | <i>Danio rerio</i> : NP_001108317                   | 1e-12 (30%)  | 40  | 17 | 1 | 1 |
|  | Stearyl-CoA desaturase                                                   | <i>Cyprinus carpio</i> : AAB03857                   | 2e-67 (61)   | 6   | 3  | 1 | 1 |
|  | Ganglioside GM2 activator precursor                                      | <i>Euprymna scolopes</i> : AAN35173                 | 3e-24 (33%)  | 33  | 11 | 4 | 4 |
|  | Vacuolar H+ ATPase                                                       | <i>Ixodes scapularis</i> : XP_002433961             | 4e-53 (87%)  | 34  | 15 | 2 | 2 |
|  | <b>Tubulin related molecules</b>                                         |                                                     |              |     |    |   |   |
|  | Alpha tubulin-like                                                       | <i>Saccoglossus kowalevskii</i> : NP_0011171794     | 4e-72 (92%)  | 6   | 1  | 1 | 1 |
|  | Tubulin, beta 2C                                                         | <i>Homo sapiens</i> : AAH24038                      | 8e-06 (97%)  | 134 | 62 | 1 | 1 |
|  | Axonemal dynein light chain p33                                          | <i>Halotis discus discus</i> : ABO26694             | 1e-118 (93%) | 16  | 7  | 1 | 1 |
|  | Dynactin subunit 6                                                       | <i>Danio rerio</i> : NP_001018487                   | 7e-57 (61%)  | 9   | 4  | 1 | 1 |
|  | Kinesin-like protein KIF9                                                | <i>Rattus norvegicus</i> : NP_001178929             | 2e-21 (43%)  | 7   | 3  | 1 | 1 |
|  | Kinesin-II 95 kDa subunit                                                | <i>Strongylocentrotus purpuratus</i> : NP_999817    | 3e-24 (55%)  | 4   | 2  | 1 | 1 |
|  | Growth arrest-specific 8                                                 | <i>Xenopus laevis</i> : NP_001090062                | 7e-23 (82%)  | 10  | 4  | 1 | 1 |
|  | <b>Autophagy and microtubule transport</b>                               |                                                     |              |     |    |   |   |
|  | Niemann-pick C1                                                          | <i>Aedes aegypti</i> : XP_001656693                 | 1e-72 (56%)  | 8   | 3  | 1 | 1 |
|  | Copper-transporting ATPase 1                                             | <i>Camponotus floridanus</i> : EFN70280             | 5e-71 (65%)  | 5   | 1  | 1 | 1 |
|  | Non-specific lipid-transfer protein                                      | <i>Danio rerio</i> : NP_957159                      | 0.0 (68%)    | 6   | 0  | 1 | 1 |
|  | Translocon-associated protein subunit alpha                              | <i>Harpegnathos saltator</i> : EFN87563             | 1e-47 (58%)  | 14  | 7  | 1 | 1 |
|  | Signal recognition particle, subunit Srp9, putative                      | <i>Ixodes scapularis</i> : XP_002411259             | 6e-28 (78%)  | 3   | 1  | 1 | 1 |
|  | Protein translocation complex beta subunit, putative                     | <i>Aedes aegypti</i> : XP_001657235                 | 4e-18 (62%)  | 8   | 4  | 1 | 1 |
|  | Major vault protein                                                      | <i>Strongylocentrotus purpuratus</i> : NP_001116989 | 2e-48 (74%)  | 5   | 1  | 1 | 1 |
|  | Syntaxin 1A                                                              | <i>Lymnaea stagnalis</i> : AA083845                 | 2e-123 (93%) | 4   | 0  | 1 | 1 |
|  | Mitochondrial import receptor subunit TOM20 homolog                      |                                                     |              | 10  | 1  | 1 | 1 |
|  | Mitochondrial import inner membrane translocase, subunit TIM23, putative | <i>Ixodes scapularis</i> : XP_002433737             | 2e-19 (37%)  | 4   | 2  | 1 | 1 |
|  | Mitochondria associated granulocyte macrophage csf signaling molecule    | <i>Aedes aegypti</i> : XP_001662322                 | 6e-23 (59%)  | 4   | 0  | 1 | 1 |
|  | Purinergic ATP P2X4 receptor subunit 1                                   | <i>Aplysia californica</i> : AAR28669.              | 2e-74 (52%)  | 10  | 4  | 1 | 2 |
|  | Gamma-aminobutyric acid receptor-associated protein-like 2               | <i>Osmerus mordax</i> : ACO09769                    | 2e-41 (77%)  | 18  | 3  | 2 | 2 |

|                          |                                                                                |                                                       |             |      |     |   |   |
|--------------------------|--------------------------------------------------------------------------------|-------------------------------------------------------|-------------|------|-----|---|---|
|                          | GABA(A) receptor-associated protein                                            | <i>Haliotis diversicolor</i> : ADI56518               | 9e-57 (98%) | 11   | 2   | 1 | 1 |
|                          | Serine/threonine-protein kinase                                                | <i>Crassostrea ariakensis</i> : ABY48704              | 4e-40 (99%) | 13   | 5   | 1 | 1 |
|                          | Autophagy-specific gene 4                                                      | <i>Nasonia vitripennis</i> : NP_001123274             | 7e-44 (49%) | 3    | 0   | 1 | 1 |
|                          | Beclin-1-like protein                                                          | <i>Camponotus floridanus</i> : EFN67583               | 3e-16 (91%) | 8    | 3   | 1 | 1 |
| <b>Respiratory chain</b> |                                                                                |                                                       |             |      |     |   |   |
|                          | <b>Oxydative stress</b>                                                        |                                                       |             |      |     |   |   |
|                          | Reactive oxygen species modulator 1                                            | <i>Xenopus tropicalis</i> : NP_001165117              | 4e-21 (65%) | 4    | 2   | 1 | 1 |
|                          | Mitochondrial F1F0-ATP synthase subunit epsilon/ATP15                          | <i>Glossina morsitans morsitans</i> : ADD20505        | 7e-11 (64%) | 4    | 2   | 1 | 1 |
|                          | Cytochrome c oxidase subunit II                                                | <i>Crassostrea gigas</i> : NP_037546                  | 0.0 (100%)  | 9    | 2   | 1 | 1 |
|                          | Cytochrome c oxidase subunit Vb/COX4                                           | <i>Simulium nigrimanum</i> : ACZ28304                 | 2e-17 (52%) | 38   | 19  | 1 | 1 |
|                          | Cytochrome b                                                                   | <i>Crassostrea gigas</i> : ACD35414                   | 0.0 (100%)  | 74   | 33  | 2 | 2 |
|                          | Succinate dehydrogenase cytochrome B small subunit precursor                   | <i>Branchiostoma belcheri tsingtauense</i> : AAQ18144 | 4e-18 (49%) | 58   | 19  | 1 | 1 |
|                          | NADH dehydrogenase [ubiquinone] iron-sulfur protein 8, mitochondrial precursor | <i>Pongo abelii</i> : NP_001125353                    | 2e-79 (74%) | 88   | 10  | 1 | 1 |
|                          | NADH dehydrogenase 1 alpha subcomplex subunit 6                                | <i>Epinephelus coioides</i> : ADG29146                | 8e-32 (51%) | 7    | 2   | 1 | 1 |
|                          | NADH dehydrogenase [ubiquinone] 1 beta subcomplex subunit 7                    | <i>Trichinella spiralis</i> : EFV51952                | 4e-21 (47%) | 5    | 1   | 1 | 1 |
|                          | Selenoprotein W, 1                                                             | <i>Danio rerio</i> : AAH92686                         | 4e-27 (69%) | 81   | 39  | 1 | 1 |
|                          | Alternative oxidase                                                            | <i>Crassostrea gigas</i> : ACL31211                   | 0.0 (100%)  | 112  | 27  | 2 | 1 |
|                          | Hexokinase                                                                     | <i>Crassostrea gigas</i> : CAJ28915                   | 0.0 (100%)  | 112  | 49  | 2 | 2 |
|                          | <b>Anti-oxidant</b>                                                            |                                                       |             |      |     |   |   |
|                          | * Microsomal glutathione S-transferase                                         | <i>Venerupis philippinarum</i> : ACU83223             | 4e-30 (50%) | 85   | 1   | 1 | 1 |
|                          | Glutathione S-transferase theta                                                | <i>Neanthes succinea</i> : ABQ82132                   | 2e-44 (51%) | 18   | 0   | 1 | 1 |
|                          | Omega class glutathione S-transferase                                          | <i>Crassostrea gigas</i> : CAD89618                   | 0.0 (100%)  | 4    | 2   | 1 | 1 |
|                          | Superoxide dismutase (Cg-EcSOD)                                                | <i>Crassostrea gigas</i> : AAY60161                   | 0.0 (100%)  | 24   | 12  | 2 | 1 |
|                          | DJ-1 (mammalian transcriptional regulator) Related family member               | <i>Caenorhabditis elegans</i> : NP_493696             | 1e-50 (60%) | 4    | 2   | 1 | 1 |
|                          | * Nucleoredoxin                                                                | <i>Amphidinium carterae</i> : ACF28636                | 2e-29 (51%) | 12   | 3   | 1 | 1 |
|                          | Antioxidant enzyme                                                             | <i>Culex quinquefasciatus</i> : XP_001865898          | 1e-14 (55%) | 96   | 23  | 1 | 1 |
|                          | Selenoprotein K                                                                | <i>Salmo salar</i> : NP_001134373                     | 3e-05 (56%) | 10   | 3   | 1 | 1 |
|                          | Serine/threonine-protein kinase PINK1, putative                                | <i>Pediculus humanus corporis</i> : XP_002432225      | 6e-27 (35%) | 1636 | 750 | 1 | 1 |
|                          | <b>DNA repair</b>                                                              |                                                       |             |      |     |   |   |
|                          | alkB, alkylation repair homolog 3                                              | <i>Xenopus laevis</i> : NP_001088803                  | 3e-84 (31%) | 5    | 0   | 1 | 1 |
|                          | RAD54 homolog B                                                                | <i>Bos taurus</i> : NP_001179884                      |             | 6    | 3   | 1 | 1 |
|                          | Topoisomerase (DNA) I, isoform CRA_c                                           | <i>Homo sapiens</i> : EAW75997                        | 2e-20 (42%) | 20   | 6   | 1 | 1 |

|                                 |                                                                           |                                                |              |      |     |   |   |
|---------------------------------|---------------------------------------------------------------------------|------------------------------------------------|--------------|------|-----|---|---|
|                                 | Retinoblastoma-binding protein 4 (rbbp4)                                  | <i>Aedes aegypti</i> : XP_001654079            | 0.0 (92%)    | 12   | 6   | 1 | 1 |
| <b>Pro- and anti-apoptose</b>   |                                                                           |                                                |              |      |     |   |   |
|                                 | <b>Pro-apoptotic</b>                                                      |                                                |              |      |     |   |   |
|                                 | Caspase 7, apoptosis-related cysteine peptidase                           | <i>Xenopus laevis</i> : NP_001091272           | 5e-17 (31%)  | 11   | 2   | 2 | 2 |
|                                 | Cytochrome c                                                              | <i>Pectinaria gouldii</i> : AAS48105           | 6e-49 (85%)  | 1837 | 880 | 1 | 1 |
|                                 | <b>Anti-apoptotic</b>                                                     |                                                |              |      |     |   |   |
|                                 | Baculoviral IAP repeat-containing protein 3                               | <i>Mus musculus</i> : NP_031490                | 2e-08 (52%)  | 20   | 5   | 2 | 2 |
|                                 | Bifunctional apoptosis regulator                                          | <i>Xenopus tropicalis</i> : AAI67891           | 2e-36 (38%)  | 4    | 2   | 1 | 1 |
|                                 | Baculoviral IAP repeat-containing protein 7                               | <i>Xenopus tropicalis</i> : NP_001106593       | 2e-08 (47%)  | 14   | 5   | 1 | 1 |
|                                 | Baculoviral IAP repeat-containing protein 3                               | <i>Homo sapiens</i> : NP_001156                | 9e-12 (54%)  | 39   | 19  | 1 | 1 |
|                                 | Inhibitor of apoptosis                                                    | <i>Aplysia californica</i> : ADI24344          | 2e-25 (36%)  | 13   | 0   | 1 | 1 |
|                                 | * Baculoviral IAP repeat-containing protein 4                             | <i>Xenopus laevis</i> : NP_001089083           | 8e-22 (29%)  | 24   | 9   | 1 | 1 |
|                                 | Ribonuclease kappa-A                                                      | <i>Danio rerio</i> : NP_001038870              | 8e-20 (50%)  | 20   | 2   | 1 | 1 |
|                                 | Hepatitis B virus x interacting protein                                   | <i>Gallus gallus</i> : NP_001165357            | 9e-14 (44%)  | 8    | 1   | 1 | 2 |
| <b>Cellular differentiation</b> |                                                                           |                                                |              |      |     |   |   |
|                                 | <b>Signaling molecules</b>                                                |                                                |              |      |     |   |   |
|                                 | Transforming growth factor-beta-inducible early growth response protein 3 | <i>Salmo salar</i> : NP_001133301              | 4e-37 (78%)  | 29   | 8   | 1 | 1 |
|                                 | Early growth response protein 1                                           | <i>Ovis aries</i> : NP_001135978               | 6e-39 (68%)  | 5    | 1   | 1 | 1 |
|                                 | Activin type II receptor                                                  | <i>Crassostrea gigas</i> : CAR92545            | 0.0 (100%)   | 37   | 11  | 2 | 2 |
|                                 | Frizzled-5 precursor                                                      | <i>Homo sapiens</i> : NP_003459                | 4e-18 (40%)  | 3    | 1   | 1 | 1 |
|                                 | Frizzled-related protein 2                                                | <i>Aplysia californica</i> : AAT07665          | 1e-62 (51%)  | 17   | 4   | 1 | 1 |
|                                 | Fizzy-like protein                                                        | <i>Saccoglossus kowalevskii</i> : NP_001161540 | 5e-106 (91%) | 18   | 7   | 1 | 1 |
|                                 | Calcyclin binding protein                                                 | <i>Xenopus tropicalis</i> : NP_001011170       | 3e-28 (43%)  | 2    | 0   | 1 | 2 |
|                                 | Regucalcin                                                                | <i>Halotis discus discus</i> : ABO26616        | 4e-55 (47%)  | 2    | 0   | 1 | 1 |
|                                 | <b>Small GTPase and other regulators</b>                                  |                                                |              |      |     |   |   |
|                                 | Rho-related GTP-binding protein RhoQ                                      | <i>Danio rerio</i> : NP_956112                 | 1e-21 (37%)  | 5    | 1   | 1 | 1 |
|                                 | Ras-like protein                                                          | <i>Homo sapiens</i> : AAA36544                 | 1e-94 (91%)  | 6    | 3   | 1 | 1 |
|                                 | * Rac GTPase-activating protein 1                                         | <i>Camponotus floridanus</i> : EFN67432        | 5e-13 (44%)  | 20   | 2   | 1 | 1 |
|                                 | Cdc42                                                                     | <i>Schistosoma mansoni</i> : XP_002579369      | 7e-37 (46%)  | 23   | 8   | 4 | 5 |
|                                 | Rho family small GTP binding protein cdc42                                | <i>Rhopalosiphum padi</i> : AAS87368           | 6e-94 (94%)  | 2    | 0   | 1 | 1 |
|                                 | Small GTPase Cdc42                                                        | <i>Schizophyllum commune</i> : XP_003036258    | 7e-63 (60%)  | 10   | 4   | 1 | 1 |
|                                 | Rab-like protein 3                                                        | <i>Harpegnathos saltator</i> : EFN90063        | 6e-64 (57%)  | 5    | 2   | 1 | 1 |

|  |                                                             |                                                 |              |    |    |   |   |
|--|-------------------------------------------------------------|-------------------------------------------------|--------------|----|----|---|---|
|  | Ras-related protein Rab-6A                                  | <i>Camponotus floridanus</i> : EFN73950         | 1e-93 (93%)  | 13 | 5  | 1 | 1 |
|  | RAB18, member RAS oncogene family                           | <i>Xenopus tropicalis</i> : NP_001017281        |              | 22 | 1  | 1 | 1 |
|  | GTPase Rab2                                                 | <i>Glossina morsitans morsitans</i> : ADD20253  | 4e-46 (50%)  | 7  | 0  | 1 | 1 |
|  | RAN GTPase activating protein 1, isoform CRA_b              | <i>Mus musculus</i> : EDL04561                  | 2e-07 (51%)  | 3  | 0  | 1 | 1 |
|  | ADP-ribosylation factor GTPase-activating protein, putative | <i>Pediculus humanus corpori</i> : XP_002426585 | 2e-25 (61)   | 5  | 1  | 1 | 1 |
|  | ADP-ribosylation factor-like protein 8A                     | <i>Homo sapiens</i> : NP_620150                 | 3e-94 (91%)  | 77 | 31 | 2 | 2 |
|  | High mobility group protein 20A                             | <i>Danio rerio</i> : NP_001082803               | 4e-17 (63%)  | 2  | 0  | 1 | 1 |
|  | Coiled-coil domain containing 101                           | <i>Xenopus tropicalis</i> : NP_001120013        | 7e-107 (68%) | 4  | 2  | 1 | 1 |
|  | T-box transcription factor TBX20                            | <i>Xenopus tropicalis</i> : NP_001030292        | 8e-29 (63%)  | 8  | 0  | 1 | 1 |
|  | Tryptophanyl-tRNA synthetase, cytoplasmic                   | <i>Bos taurus</i> : DAA17278                    | 2e-172 (73%) | 26 | 5  | 1 | 2 |
|  | Serine/threonine protein phosphatase, putative              | <i>Ixodes scapularis</i> : XP_002414442         | 6e-13 (100%) | 4  | 2  | 1 | 1 |
|  | Src tyrosine kinase 2                                       | <i>Aplysia californica</i> : ACI23623           | 6e-103 (88%) | 7  | 0  | 1 | 1 |
|  | Cyclin G1                                                   | <i>Xenopus laevis</i> : NP_001090435            | 9e-22 (34%)  | 44 | 22 | 1 | 1 |
|  | B-cell translocation gene 1 (BTG1)                          | <i>Crassostrea gigas</i> : ACH92125             | 0.0 (100%)   | 7  | 2  | 1 | 1 |
|  | Origin recognition complex, subunit 1                       | <i>Xenopus laevis</i> : NP_001081806            | 8e-145 (70%) | 12 | 5  | 1 | 1 |
|  | Origin recognition complex subunit 3                        | <i>Bos taurus</i> : DAA26171                    | 2e-13 (63%)  | 2  | 1  | 1 | 1 |

\* Genes used for qPCR analysis.
